# Supplementary material
Source: PubMed Central journal article supplement (PMC3465381)
Supplement: 1210443109_pnas.201210443SI.pdf [file 1210443109_pnas.201210443SI.pdf]

# Supporting Information

Rothe et al. 10.1073/pnas.1210443109

## SI Materials and Methods

**Growth Conditions, Strains, and Plasmids.** Bacteria were routinely grown in LB containing antibiotics (50 or 100  $\mu\text{g}/\text{mL}$  ampicillin, 10  $\mu\text{g}/\text{mL}$  tetracycline, 20  $\mu\text{g}/\text{mL}$  chloramphenicol, 40  $\mu\text{g}/\text{mL}$  kanamycin) when necessary. For determination of  $\beta$ -galactosidase activities, *Escherichia coli* strains were grown in M9 minimal medium containing 1% (wt/vol) glycerol, proline (20  $\mu\text{g}/\text{mL}$ ), thiamine (1  $\mu\text{g}/\text{mL}$ ), casamino acids [0.66% (wt/vol)] and the appropriate antibiotics. Where indicated, 1 mM isopropyl- $\beta$ -D-1-thiogalactopyranoside (IPTG) was added as inducer for *tacOP* and 7 mM D-salicin was added as substrate for BglF.

The strains and plasmids used are described in Table S1. Oligonucleotides are listed in Table S2. Plasmid pFDX4732 was constructed by ligating the AseI-HindIII fragment of plasmid pFDX3214 encompassing the *fruB* gene between the AseI/HindIII sites of plasmid pFDX3852. The series of plasmids pFDX4733-pFDX4739 was constructed by ligation of the XhoI-SalI fragment of plasmid pFDX4291 encompassing the pSC101 origin of replication and the *cat* gene to the SalI-SalI fragments encompassing the *P<sub>tac</sub>* expression cassettes of the following plasmids, which resulted in the plasmids given in parentheses, respectively: pFDX3161 (pFDX4733), pFDX3851 (pFDX4735),

pFDX3852 (pFDX4736), pFDX3221 (pFDX4737), pFDX4732 (pFDX4738), and pFDX3214 (pFDX4739). For construction of plasmids pGP1286 and pGP1319 carrying *strep-bglG* and *strep-s<sub>tag</sub>-bglG* under T7 promoter control, respectively, *bglG* was amplified from chromosomal DNA using primers FR108/FR109 (for *strep-bglG*) and primers FR181/FR109 (for *strep-s<sub>tag</sub>-bglG*) and cloned between the SacI and BamHI sites of plasmid pGP172. Plasmids pGP1309 and pGP1320 carrying *strep-bglG-H208A* and *strep-s<sub>tag</sub>-bglG-H208A* under T7 promoter control, respectively, were constructed in the same manner, but with the difference that plasmid pFDX4221 was used as template for PCR. Plasmid pGP438 carrying *strep-ptsH* (*ptsH* from *Bacillus subtilis*) under T7 promoter control was constructed by amplification of the *ptsH* gene from the *B. subtilis* chromosome using primers SHU54 and SB46 and subsequent cloning of the resulting PCR fragment between the SacI and BamHI sites of plasmid pGP172. For construction of plasmids pGP1287, pGP1288, and pGP1299 carrying His<sub>10</sub>-*ptsH*, His<sub>10</sub>-*fruB* and His<sub>10</sub>-*ptsI* under *P<sub>tac</sub>* control, respectively, the respective genes were amplified by PCR using primers FR120/FR121 (*ptsH*), FR122/FR123 (*fruB*), and FR128/FR129 (*ptsI*). Subsequently, the PCR fragments were used to substitute the NheI-XbaI fragment encompassing *ptsN* in plasmid pBGG190.

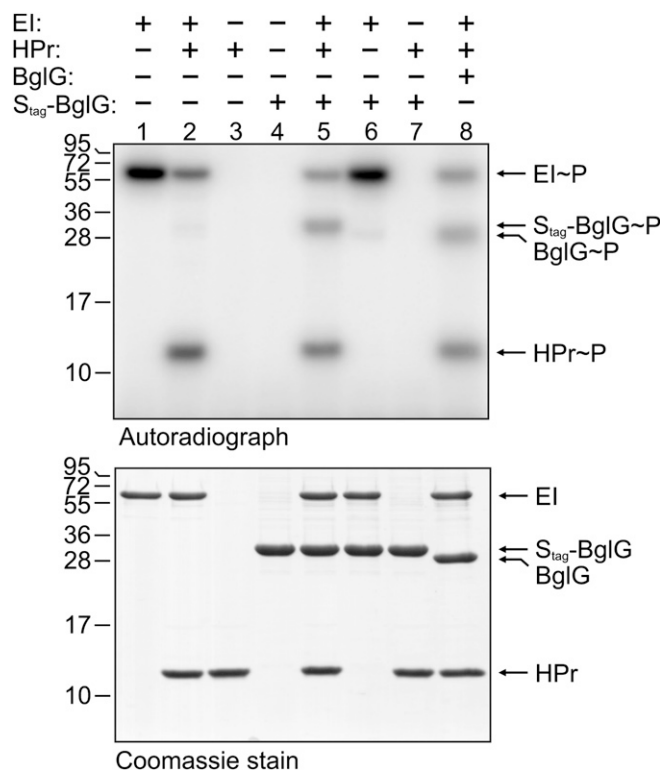

**Fig. S1.** PEP and EI-dependent phosphorylation of the Strep-S<sub>tag</sub>-BglG fusion protein by HPr in vitro. Phosphorylation assays were carried out using either [<sup>32</sup>P]-PEP (Upper) or 1  $\mu\text{M}$  cold PEP (Lower). In these assays, purified His<sub>10</sub>-EI, His<sub>10</sub>-HPr, and Strep-S<sub>tag</sub>-BglG were present as indicated. In the last lane, Strep-BglG was used as a control to demonstrate the increased molecular weight caused by the additional S<sub>tag</sub> in Strep-S<sub>tag</sub>-BglG. After, the assay proteins were separated on 15% SDS-polyacrylamide gels and subsequently analyzed by phosphoimaging (Upper) or staining with Coomassie brilliant blue (Lower). Positions of the molecular weight marker are given at Left.

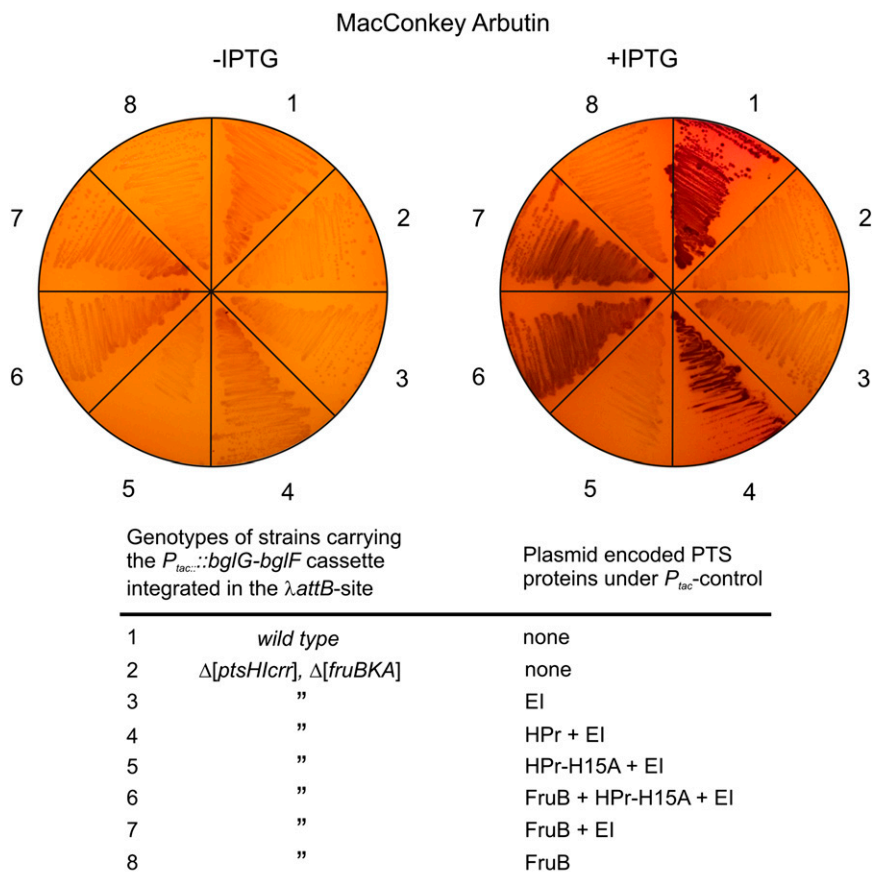

**Fig. S2.** FruB can substitute for HPr in aryl- $\beta$ -glucoside transport. Strains R1752 (1, wild type) and R1977 (2–8;  $\Delta[ptsH, ptsI, crr]::neo, \Delta[fruB, fruK, fruA]$ ) were transformed with low copy plasmids carrying  $P_{tac}$ -controlled genes coding for the PTS proteins as indicated. These plasmids were pFDX283 (sectors 1 and 2), pFDX3161 (sector 3), pFDX3851 (sector 4), pFDX3852 (sector 5), pFDX4732 (sector 6), pFDX3221 (sector 7), and pFDX3214 (sector 8). Strains also carried an artificial  $P_{tac}::bglG-bglF$  operon integrated into the chromosomal  $\lambda attB$  site, whereas the natural  $bgl$  operon was deleted. To allow for regulated expression of the genes under  $P_{tac}$  control, the strains additionally carried the compatible plasmid pFDX3158 as source for LacI repressor. The various transformants were streaked on MacConkey indicator plates containing the aryl- $\beta$ -glucoside arbutin and IPTG for induction of  $P_{tac}$ -controlled genes as indicated (–IPTG, *Left*; +IPTG, *Right*). A dark red color of the colonies indicates uptake and utilization of arbutin. It should be noted that these strains can transport the aryl- $\beta$ -glucoside salicin, but are unable to catabolize this sugar due to the absence of the phospho- $\beta$ -glucosidase BglB, which is encoded by the third gene of the  $bgl$  operon. Arbutin, which is also transported by BglF, is catabolized by the phospho- $\beta$ -glucosidase BglA, encoded elsewhere, which is constitutively expressed (1). BglA is able to degrade phosphoarbutin, but not phosphosalicin (2). The data show that presence of EI and HPr (sector 4) or EI and FruB (sectors 6 and 7) allows transport and utilization of arbutin (*Right*).

1. Junne T, Schnetz K, Rak B (1990) Location of the *bglA* gene on the physical map of *Escherichia coli*. *J Bacteriol* 172:6615–6616.
2. Prasad I, Young B, Schaefer S (1973) Genetic determination of the constitutive biosynthesis of phospho- $\beta$ -glucosidase A in *Escherichia coli* K-12. *J Bacteriol* 114:909–915.

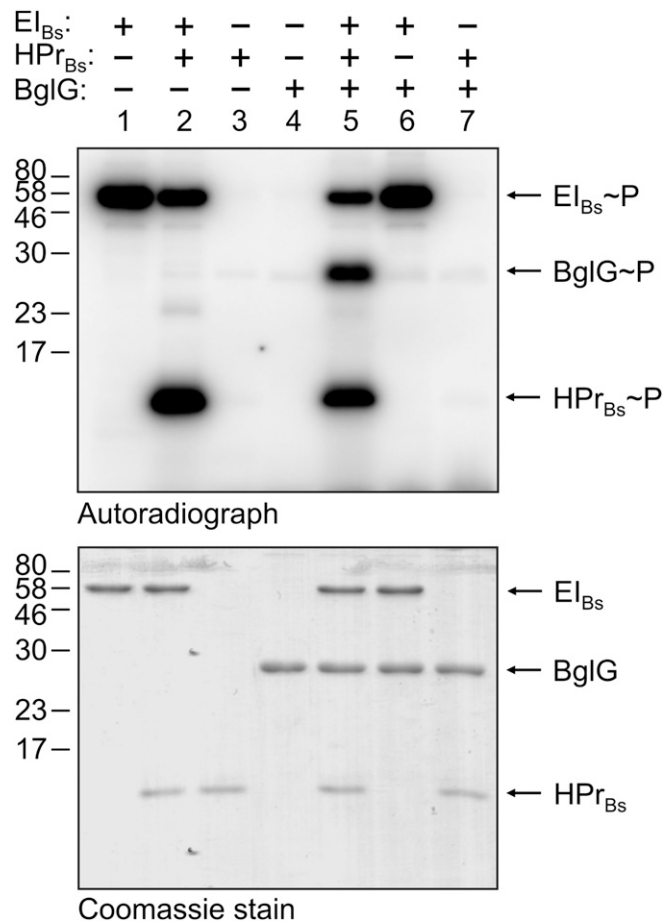

**Fig. S3.** BglG also becomes phosphorylated in vitro by HPr from *Bacillus subtilis*. It has previously been shown that BglG also gains activity, when EI and HPr in *E. coli* are replaced by their homologs from *B. subtilis*. This activation of BglG occurred in a strain lacking the *fruBKA* operon and required the His15 phosphorylation site in HPr, suggesting that HPr from *B. subtilis* is able to activate BglG by phosphorylation like its *E. coli* homolog (1). To test whether phosphoryl-group transfer is indeed possible between these two proteins, we carried out PEP-dependent in vitro phosphorylation assays using purified recombinant His<sub>6</sub>-EI and Strep-HPr, both from *B. subtilis* (El<sub>Bs</sub> and HPr<sub>Bs</sub>). Proteins were tested in various combinations as indicated. Assays were carried out using either [<sup>32</sup>P]-PEP (Upper) or 1 μM cold PEP (Lower). Proteins were subsequently separated by denaturing gel electrophoresis using 15% SDS-polyacrylamide gels. Gels were analyzed by phosphoimaging (Upper) or staining with Coomassie brilliant blue (Lower). Positions of the molecular weight marker are given at Left. The data show that both El<sub>Bs</sub> and HPr<sub>Bs</sub> became phosphorylated when incubated together with [<sup>32</sup>P]-PEP (lane 2). When Strep-BglG was additionally present, it also became phosphorylated, but not when it was incubated with El<sub>Bs</sub> or HPr<sub>Bs</sub> alone (lanes 5–7). In conclusion, BglG can also be phosphorylated by HPr from *B. subtilis*.

1. Reichenbach B, Breustedt DA, Stülke J, Rak B, Görke B (2007) Genetic dissection of specificity determinants in the interaction of HPr with enzymes II of the bacterial phosphoenolpyruvate:sugar phosphotransferase system in *Escherichia coli*. *J Bacteriol* 189:4603–4613.

**Table S1. *E. coli* strains and plasmids used in this study**

| Name            | Genotype                                                                                                                                                                           | Reference |
|-----------------|------------------------------------------------------------------------------------------------------------------------------------------------------------------------------------|-----------|
| <b>Strains</b>  |                                                                                                                                                                                    |           |
| FT1/pLysS       | BL21(DE3) $\Delta$ [ <i>ptsH</i> , <i>ptsI</i> , <i>crr</i> ]::neo/pLysS, <i>cat</i>                                                                                               | (1)       |
| R1279           | CSH50 $\Delta$ ( <i>pho-bgl</i> )201 $\Delta$ ( <i>lac-pro</i> ) <i>ara thi</i>                                                                                                    | (2)       |
| R1752           | as R1279, but <i>attB</i> :: <i>tacOP-bglG-bglF</i> ( <i>bla</i> )                                                                                                                 | (3)       |
| R1969           | as R1279, but $\Delta$ [ <i>ptsH</i> , <i>ptsI</i> , <i>crr</i> ]::neo, $\Delta$ [ <i>fruB</i> , <i>fruK</i> , <i>fruA</i> ]                                                       | (4)       |
| R1977           | as R1279, but <i>attB</i> :: <i>tacOP-bglG-bglF</i> ( <i>bla</i> ), $\Delta$ [ <i>ptsH</i> , <i>ptsI</i> , <i>crr</i> ]::neo, $\Delta$ [ <i>fruB</i> , <i>fruK</i> , <i>fruA</i> ] | (3)       |
| R2013           | as R1279, but <i>attB</i> :: <i>tacOP-bglG-bglF</i> ( <i>bla</i> ), $\Delta$ [ <i>ptsH</i> , <i>ptsI</i> , <i>crr</i> ]::neo                                                       | (3)       |
| <b>Plasmids</b> |                                                                                                                                                                                    |           |
| pAG3            | <i>His<sub>6</sub>-ptsI</i> ( <i>B. subtilis</i> ) under T5 promoter control in pQE30, <i>bla</i> , <i>ori</i> ColEI                                                               | (5)       |
| pBGG190         | <i>His<sub>10</sub>-ptsN</i> under control of <i>P<sub>tac</sub></i> , <i>bla</i> , <i>ori</i> ColEI                                                                               | (6)       |
| pFDX283         | <i>P<sub>tac</sub></i> , <i>tet</i> , <i>ori</i> p15A (empty vector)                                                                                                               | (7)       |
| pFDX2942        | <i>P<sub>tac</sub>-bglG</i> , <i>SD</i> of <i>gene10</i> of phage T7 in front of <i>bglG</i> , <i>tet</i> , <i>ori</i> p15A                                                        | (3)       |
| pFDX3158        | <i>lacI<sup>f</sup></i> , <i>P<sub>16</sub>-bglT2- lacZ</i> , <i>cat</i> , <i>ori</i> ColEI                                                                                        | (3)       |
| pFDX3161        | <i>ptsI</i> under control of <i>P<sub>tac</sub></i> , <i>tet</i> , <i>ori</i> p15A                                                                                                 | (3)       |
| pFDX3214        | <i>fruB</i> under control of <i>P<sub>tac</sub></i> , <i>tet</i> , <i>ori</i> p15A                                                                                                 | (3)       |
| pFDX3221        | <i>fruB</i> and <i>ptsI</i> under control of <i>P<sub>tac</sub></i> , <i>tet</i> , <i>ori</i> p15A                                                                                 | (3)       |
| pFDX3225        | <i>P<sub>tac</sub>-galk'-bglG</i> , <i>SD</i> of <i>gene10</i> of phage T7 in front of <i>galk'-bglG</i> , <i>tet</i> , <i>ori</i> p15A                                            | (3)       |
| pFDX3851        | <i>ptsH</i> and <i>ptsI</i> under control of <i>P<sub>tac</sub></i> , <i>tet</i> , <i>ori</i> p15A                                                                                 | (4)       |
| pFDX3852        | <i>ptsH-H15A</i> and <i>ptsI</i> under control of <i>P<sub>tac</sub></i> , <i>tet</i> , <i>ori</i> p15A                                                                            | (4)       |
| pFDX4221        | <i>bglG-H208A</i> and <i>bglF</i> under control of <i>P<sub>tac</sub></i> , <i>tet</i> , <i>ori</i> p15A                                                                           | (8)       |
| pFDX4291        | operator-less <i>P<sub>tac</sub></i> , <i>sacB-SD</i> , MCS, <i>cat</i> , <i>ori</i> pSC101                                                                                        | (9)       |
| pFDX4732        | <i>fruB</i> , <i>ptsH-H15A</i> and <i>ptsI</i> under control of <i>P<sub>tac</sub></i> , <i>tet</i> , <i>ori</i> p15A                                                              | This work |
| pFDX4733        | <i>ptsI</i> under control of <i>P<sub>tac</sub></i> , <i>cat</i> , <i>ori</i> pSC101                                                                                               | This work |
| pFDX4735        | <i>ptsH</i> and <i>ptsI</i> under control of <i>P<sub>tac</sub></i> , <i>cat</i> , <i>ori</i> pSC101                                                                               | This work |
| pFDX4736        | <i>ptsH-H15A</i> and <i>ptsI</i> under control of <i>P<sub>tac</sub></i> , <i>cat</i> , <i>ori</i> pSC101                                                                          | This work |
| pFDX4737        | <i>fruB</i> and <i>ptsI</i> under control of <i>P<sub>tac</sub></i> , <i>cat</i> , <i>ori</i> pSC101                                                                               | This work |
| pFDX4738        | <i>fruB</i> , <i>ptsH-H15A</i> and <i>ptsI</i> under control of <i>P<sub>tac</sub></i> , <i>cat</i> , <i>ori</i> pSC101                                                            | This work |
| pFDX4739        | <i>fruB</i> under control of <i>P<sub>tac</sub></i> , <i>cat</i> , <i>ori</i> pSC101                                                                                               | This work |
| pFDY226         | <i>lacI<sup>f</sup></i> , <i>P<sub>16</sub>-bglT2- lacZ</i> , <i>bla</i> , <i>ori</i> ColEI                                                                                        | (2)       |
| pGP172          | T7-promoter-streptag-MCS, <i>bla</i> , <i>ori</i> ColEI                                                                                                                            | (10)      |
| pGP438          | <i>strep-ptsH</i> ( <i>B. subtilis</i> ) under T7 promoter control, <i>bla</i> , <i>ori</i> ColEI                                                                                  | S. Hübner |
| pGP1286         | <i>strep-bglG</i> under T7 promoter control, <i>bla</i> , <i>ori</i> ColEI                                                                                                         | This work |
| pGP1287         | <i>His<sub>10</sub>-ptsH</i> ( <i>E. coli</i> ) under control of <i>P<sub>tac</sub></i> , <i>bla</i> , <i>ori</i> ColEI                                                            | This work |
| pGP1288         | <i>His<sub>10</sub>-fruB</i> under control of <i>P<sub>tac</sub></i> , <i>bla</i> , <i>ori</i> ColEI                                                                               | This work |
| pGP1299         | <i>His<sub>10</sub>-ptsI</i> ( <i>E. coli</i> ) under control of <i>P<sub>tac</sub></i> , <i>bla</i> , <i>ori</i> ColEI                                                            | This work |
| pGP1309         | as pGP1286, but <i>bglG</i> with a H208A exchange (CAT→GCT)                                                                                                                        | This work |
| pGP1319         | <i>strep-s<sub>tag</sub>-bglG</i> under T7 promoter control, <i>bla</i> , <i>ori</i> ColEI                                                                                         | This work |
| pGP1320         | <i>strep-s<sub>tag</sub>-bglG-H208A</i> under T7 promoter control, <i>bla</i> , <i>ori</i> ColEI                                                                                   | This work |

*Ori*, origin of replication; *SD*, Shine-Dalgarno sequence; MCS, multiple cloning site; *strep*, sequence encoding the Strep-tag epitope, which is a synthetic peptide that exhibits intrinsic affinity toward the streptavidin derivative Strep-Tactin and consists of the eight amino acids Trp-Ser-His-Pro-Gln-Phe-Glu-Lys; *s<sub>tag</sub>*, sequence encoding the S-tag epitope, which corresponds to the first 15 residues of pancreatic RNase A and consists of the amino acids Lys-Glu-Thr-Ala-Ala-Lys-Phe-Glu-Arg-Gln-His-Met-Asp-Ser.

1. Parche S, Schmid R, Ritgemeyer F (1999) The phosphotransferase system (PTS) of *Streptomyces coelicolor* identification and biochemical analysis of a histidine phosphocarrier protein HPr encoded by the gene *ptsH*. *Eur J Biochem* 265:308–317.
2. Schnetz K, et al. (1996) LicT, a *Bacillus subtilis* transcriptional antiterminator protein of the BglG family. *J Bacteriol* 178:1971–1979.
3. Görke B, Rak B (1999) Catabolite control of *Escherichia coli* regulatory protein BglG activity by antagonistically acting phosphorylations. *EMBO J* 18:3370–3379.
4. Reichenbach B, Breustedt DA, Stülke J, Rak B, Görke B (2007) Genetic dissection of specificity determinants in the interaction of HPr with enzymes II of the bacterial phosphoenolpyruvate:sugar phosphotransferase system in *Escherichia coli*. *J Bacteriol* 189:4603–4613.
5. Galinier A, et al. (1997) The *Bacillus subtilis* *crh* gene encodes a HPr-like protein involved in carbon catabolite repression. *Proc Natl Acad Sci USA* 94:8439–8444.
6. Lüttmann D, et al. (2009) Stimulation of the potassium sensor KdpD kinase activity by interaction with the phosphotransferase protein IIA<sup>(Ntr)</sup> in *Escherichia coli*. *Mol Microbiol* 72: 978–994.
7. Görke B, Rak B (2001) Efficient transcriptional antitermination from the *Escherichia coli* cytoplasmic membrane. *J Mol Biol* 308:131–145.
8. Görke B (2003) Regulation of the *Escherichia coli* antiterminator protein BglG by phosphorylation at multiple sites and evidence for transfer of phosphoryl groups between monomers. *J Biol Chem* 278:46219–46229.
9. Kalamorz F, Reichenbach B, März W, Rak B, Görke B (2007) Feedback control of glucosamine-6-phosphate synthase GlmS expression depends on the small RNA GlmZ and involves the novel protein YhbJ in *Escherichia coli*. *Mol Microbiol* 65:1518–1533.
10. Merzbacher M, Detsch C, Hillen W, Stülke J (2004) *Mycoplasma pneumoniae* HPr kinase/phosphorylase. *Eur J Biochem* 271:367–374.

**Table S2. Oligonucleotides used in this study**

| Primer | Sequence                                                                           | Res. sites | Purpose                             |
|--------|------------------------------------------------------------------------------------|------------|-------------------------------------|
| FR108  | AAAGAGCTC <u>Gatg</u> AACATGCAAATCACCAAATTCTC                                      | SacI       | <i>bglG</i> forward                 |
| FR109  | TTTGGATCC <u>tca</u> GTGTTCTTTGCGCACG                                              | BamHI      | <i>bglG</i> reverse                 |
| FR120  | AAAGCTAGCatgTTCCAGCAAGAAGTTACCATTAC                                                | NheI       | <i>ptsH<sub>Ec</sub></i> forward    |
| FR121  | TTTTCTAGAttaCTCGAGTTCCGCCATCA                                                      | XbaI       | <i>ptsH<sub>Ec</sub></i> reverse    |
| FR122  | AAAGCTAGCatgTTCCAGTTATCCGTACAGG                                                    | NheI       | <i>fruB</i> forward                 |
| FR123  | TTTTCTAGAttaTGCGCCCTCCCAAG                                                         | XbaI       | <i>fruB</i> reverse                 |
| FR126  | GCACAGCTGAACCTGAAG                                                                 |            | <i>ptsI<sub>Ec</sub></i> sequencing |
| FR127  | GCGCAGTTCCTGTTTGTAG                                                                |            | <i>ptsI<sub>Ec</sub></i> sequencing |
| FR128  | AAAGCTAGCatgATTTCAAGGATTTTAGCATCCCCGGGTATC                                         | NheI       | <i>ptsI<sub>Ec</sub></i> forward    |
| FR129  | TTTTCTAGAttaGCAGATTGTTTTTCTTCAATGAACTTGTTAACCAAG                                   | XbaI       | <i>ptsI<sub>Ec</sub></i> reverse    |
| FR181  | AAAGAGCTCGAAAGAAACCGCGGCGAAATTTGAACGTCAGCATA<br>TGGATAGCatgAACATGCAAATCACCAAATTCTC | SacI       | <i>bglG-S<sub>tag</sub></i> forward |
| SB46   | AAAGGATCC <u>tta</u> CTCGCCGAGTCCTTCGCTTTTCAT                                      | BamHI      | <i>ptsH<sub>Bs</sub></i> reverse    |
| SHU54  | AAAGAGCTCgatgGCACAAAAACATTTAAAGTAACTGC                                             | SacI       | <i>ptsH<sub>Bs</sub></i> forward    |

Restriction sites are underlined; start and stop codons are in small caps. *Ec*, *E. coli*; *Bs*, *B. subtilis*.
